# Supplementary material for: Effects of Tai Chi Chuan on Cognitive Function in Adults 60 Years or Older With Type 2 Diabetes and Mild Cognitive Impairment in China: A Randomized Clinical Trial
Source: PubMed Central journal article supplement (PMC10080376; doi:10.1001/jamanetworkopen.2023.7004), 2023-04-06

## Supplementary Online Content

Chen Y, Qin J, Tao L, et al. Effects of tai chi chuan on cognitive function in adults 60 years or older with type 2 diabetes and mild cognitive impairment in China: a randomized clinical trial. *JAMA Netw Open*. 2023;6(4):e237004.  
doi:10.1001/jamanetworkopen.2023.7004

**eTable 1.** Medians (IQR) of Diabetes Medication, Patient Self-reported Dietary Calories, and Physical Activity of 3 Groups by ITT

**eTable 2.** Mean Difference (SD) of MoCA in 3 Groups by MITT

**eTable 3.** Generalized Linear Model of MoCA and Physical Activity by ITT

**eTable 4.** Safety Outcomes: Adverse Events

**eFigure.** Subgroup Analysis of MoCA in 24 Weeks by ITT

This supplementary material has been provided by the authors to give readers additional information about their work.

**eTable 1.** Medians (IQR) of Diabetes Medication, Patient Self-reported Dietary Calories, and Physical Activity of 3 Groups by ITT

| ITT                                                    | Median(IQR)              |                            |                    |
|--------------------------------------------------------|--------------------------|----------------------------|--------------------|
|                                                        | Tai Chi Chuan<br>(n=107) | Fitness Walking<br>(n=110) | Control<br>(n=111) |
| <b>Diabetes medication</b>                             |                          |                            |                    |
| baseline                                               | 2(1)                     | 2(1)                       | 2(1)               |
| 24weeks                                                | 2(1)                     | 2(1)                       | 2(1)               |
| 36weeks                                                | 2(1)                     | 2(1)                       | 2(1)               |
| <b>Dietary<sup>a</sup> (calorie)</b>                   |                          |                            |                    |
| baseline                                               | 1163(549)                | 1086(677)                  | 1186(758)          |
| 24weeks                                                | 1038(521)                | 1049(534)                  | 1135(744)          |
| 36weeks                                                | 1214(435)                | 1215(366)                  | 1274(596)          |
| <b>Total METs<sup>b</sup> (min.wk<sup>-1</sup>)</b>    |                          |                            |                    |
| baseline                                               | 1188(1287)               | 1270(1346)                 | 1095(1487)         |
| 24weeks                                                | 2011(1416)               | 2187(1678)                 | 2290(2038)         |
| 36weeks                                                | 1540(1000)               | 1350(864)                  | 1379(969)          |
| <b>Vigorous METs<sup>c</sup> (min.wk<sup>-1</sup>)</b> |                          |                            |                    |
| baseline                                               | 33(116)                  | 43(139)                    | 110(191)           |
| 24weeks                                                | 147(208)                 | 125(191)                   | 193(237)           |
| 36weeks                                                | 56(82)                   | 53(121)                    | 104(336)           |
| <b>Moderate METs<sup>d</sup> (min.wk<sup>-1</sup>)</b> |                          |                            |                    |
| baseline                                               | 514(542)                 | 439(521)                   | 296(537)           |
| 24weeks                                                | 968(745)                 | 1005(877)                  | 1033(645)          |
| 36weeks                                                | 894(735)                 | 738(522)                   | 625(568)           |
| <b>Walking METs<sup>e</sup> (min.wk<sup>-1</sup>)</b>  |                          |                            |                    |
| baseline                                               | 641(964)                 | 788(1088)                  | 689(1079)          |
| 24weeks                                                | 1383(641)                | 1505(809)                  | 1471(744)          |
| 36weeks                                                | 610(610)                 | 573(469)                   | 691(583)           |
| <b>Sedentary time (min)</b>                            |                          |                            |                    |
| baseline                                               | 305(138)                 | 304(146)                   | 280(150)           |
| 24weeks                                                | 309(142)                 | 299(139)                   | 301(119)           |
| 36weeks                                                | 355(135)                 | 340(109)                   | 327(125)           |

<sup>a</sup> Dietary assessment using Self-Reported 24-Hour Recalls.

<sup>b</sup> METs=Amount of metabolic equivalent minutes per week (METs min.wk<sup>-1</sup>) in the IPAQ-S categories.

<sup>c</sup> Vigorous intensity =8.0 METs

<sup>d</sup> Moderate intensity =4.0 METs

<sup>e</sup> Walking intensity =3.3 METs

**eTable 2.** Mean Difference (SD) of MoCA in 3 Groups by MITT

|                               | Tai Chi Chuan | Fitness Walking | Control     | <i>P</i> value   | Between-group change, mean (95% CI) |                             |                             |
|-------------------------------|---------------|-----------------|-------------|------------------|-------------------------------------|-----------------------------|-----------------------------|
|                               |               |                 |             |                  | Tai Chi Chuan vs Fitness Walking    | Tai Chi Chuan vs control    | Fitness Walking vs Control  |
| MITT, n                       | 101           | 103             | 99          |                  |                                     |                             |                             |
| MoCA, mean(SD), ( range 0-30) |               |                 |             |                  |                                     |                             |                             |
| baseline                      | 21.38(2.76)   | 21.51(2.51)     | 21.29(2.8)  | .84              | -0.14(-0.88 to 0.6)                 | 0.08(-0.67 to 0.83)         | 0.22(-0.52 to 0.97)         |
| 24 weeks                      | 24.08(3.12)   | 23.6(3.43)      | 22.48(3.45) | <b>.003</b>      | 0.48(-0.44 to 1.40)                 | <b>1.59(0.67 to 2.52) *</b> | <b>1.12(0.19 to 2.04) *</b> |
| 36 weeks                      | 24.81(2.65)   | 23.92(3.24)     | 22.69(3.34) | <b>&lt; .001</b> | <b>0.89(0.04 to 1.74) *</b>         | <b>2.13(1.27 to 2.98) *</b> | <b>1.24(0.38 to 2.09) *</b> |

**eTable 3.** Generalized Linear Model of MoCA and Physical Activity by ITT

| ITT          |                 | $\beta$ | SE     | <i>P</i> |
|--------------|-----------------|---------|--------|----------|
| 24weeks_MoCA | Tai Chi Chuan   | 0.000   |        |          |
|              | Fitness Walking | -0.559  | 0.3654 | .126     |
|              | Control         | -1.618  | 0.3722 | <.001    |
| 36weeks_MoCA | Tai Chi Chuan   | 0.000   |        |          |
|              | Fitness Walking | -0.935  | 0.355  | .009     |
|              | Control         | -2.031  | 0.362  | <.001    |

Note: Adjusted after T0\_MoCA and T0\_vigorous METs

**eTable 4.** Safety Outcomes: Adverse Events

|                             | Tai Chi Chuan<br>(n=107)      | Fitness Walking<br>(n=110) | Control<br>(n=111) | <i>P</i> |
|-----------------------------|-------------------------------|----------------------------|--------------------|----------|
| Adverse events              | Participants with events, No. |                            |                    |          |
| Total adverse events        | 8                             | 13                         | 16                 | .263     |
| Hypoglycemia                | 1                             | 2                          | 0                  |          |
| Fall                        | 5                             | 10                         | 15                 | .077     |
| Fracture                    | 1                             | 1                          | 0                  |          |
| Hospitalizations            | 0                             | 0                          | 1                  |          |
| Emergency department visits | 1                             | 0                          | 0                  |          |

**eFigure. Subgroup Analysis of MoCA in 24 Weeks by ITT**

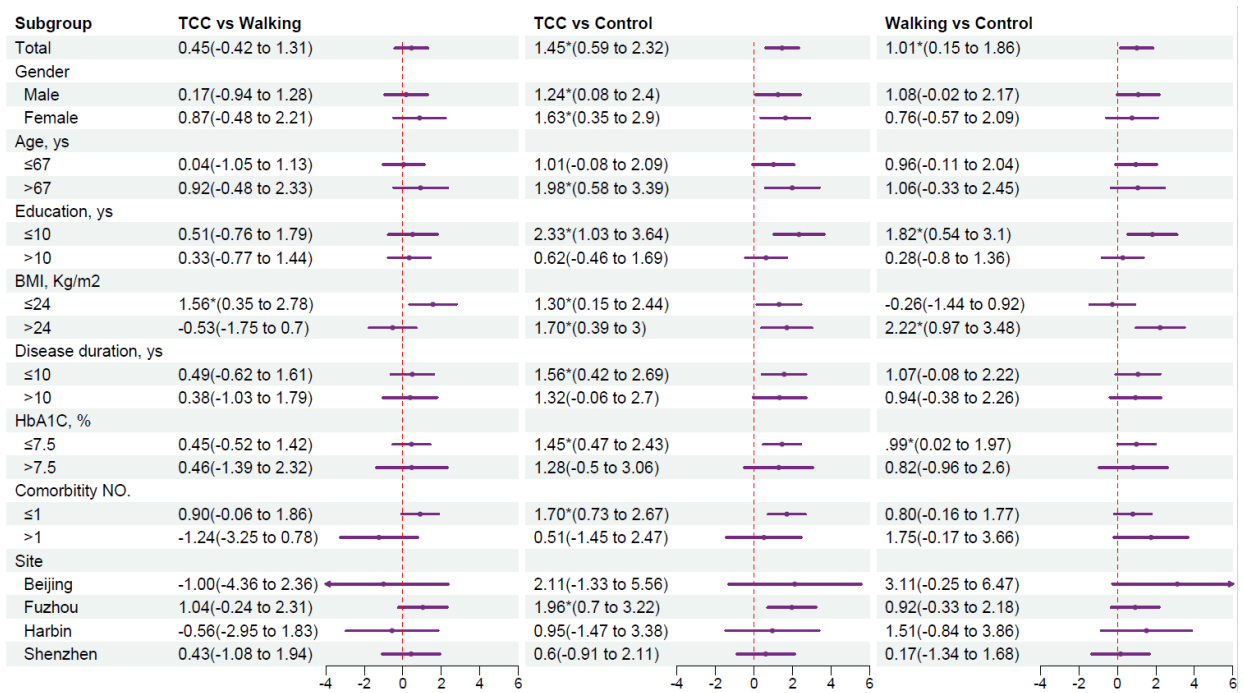

Supplement: jamanetwopen-e237004-s002.pdf [file jamanetwopen-e237004-s002.pdf]
