# Supplementary material for: Effects of Tai Chi Chuan on Cognitive Function in Adults 60 Years or Older With Type 2 Diabetes and Mild Cognitive Impairment in China: A Randomized Clinical Trial
Source: PubMed Central journal article supplement (PMC10080376; doi:10.1001/jamanetworkopen.2023.7004), 2023-04-06
Supplement: jamanetwopen-e237004-s003.pdf [file jamanetwopen-e237004-s003.pdf]

## Data Sharing Statement

Chen. Effects of Tai Chi Chuan on Cognitive Function in Adults 60 Years or Older With Type 2 Diabetes and Mild Cognitive Impairment in China. *JAMA Netw Open*. Published April 06, 2023. doi:10.1001/jamanetworkopen.2023.7004

### Data

**Data available:** Yes

**Data types:** Deidentified participant data

**How to access data:** How to access data: Send request email to Professor Tao, [taojing01@fjtcn.edu.cn](mailto:taojing01@fjtcn.edu.cn)

**When available:** With publication

### Supporting Documents

**Document types:** None

### Additional Information

**Who can access the data:** anyone requesting the data

**Types of analyses:** for any purpose

**Mechanisms of data availability:** with investigator support
